# Supplementary material for: Technical note: A low-cost albedometer for snow and ice measurements –Theoretical results and application on a tropical mountain in Bolivia
Source: Copernicus journal article supplement (doi:10.5194/gi-2017-55), 2018-01-15
Supplement: Supplementary file [file gi-2017-55-AC1-supplement.pdf]

1

2 **Submitted to: Geoscientific Instrumentation, Methods and Data Systems (GI)**

3 **Technical note: A low-cost albedometer for snow and ice measurements –**  
4 **Theoretical results and application on a tropical mountain in Bolivia**

5 Thomas Condom<sup>1\*</sup>, Marie Dumont<sup>2</sup>, Lise Mourre<sup>1</sup>, Jean Emmanuel Sicart<sup>1</sup>, Antoine  
6 Rabatel<sup>1</sup>, Alessandra Viani<sup>1</sup>, Alvaro Soruco<sup>3</sup>

7 [1] Université de Grenoble Alpes, IRD, CNRS, Grenoble-INP, IGE (UMR5001), F-  
8 38000 Grenoble, France

9 [2] Météo-France, CNRS, CNRM-GAME/CEN (UMR3589), Grenoble, France

10 [3] UMSA, Instituto de Geológicas y del Medio Ambiente, La Paz, Bolivia

11

12 \*Corresponding author: thomas.condom@ird.fr

13

## 14 **Abstract**

15 This study presents a new instrument called a low-cost albedometer (LCA) composed  
16 of two illuminance sensors that are used to measure *in-situ* incident and reflected  
17 illuminance values on a daily timescale. The ratio between reflected vs. incident  
18 illuminances is called the *albedo index* and can be compared with actual albedo values.  
19 Due to the shape of the sensor, the direct radiation for zenith angles ranging from 55°  
20 to 90° is not measured. The spectral response of the LCA varies with the solar  
21 irradiance wavelengths within the range 0.26 to 1.195  $\mu\text{m}$ , and the LCA detects 85%  
22 of the total spectral solar irradiance for clear sky conditions. We first consider the  
23 theoretical results obtained for 10 different ice and snow surfaces with clear sky and  
24 cloudy sky incident solar irradiance that show that the LCA spectral response may be  
25 responsible for an overestimation of the theoretical albedo values by roughly 9% at  
26 most. Then, the LCA values are compared with two “traditional” albedometers CM3  
27 pyranometer (Kipp & Zonen®) in the shortwave domain from 0.305 to 2.800  $\mu\text{m}$  over a  
28 one-year measurement period (2013) for two sites in a tropical mountainous catchment  
29 in Bolivia. One site is located on the Zongo Glacier (i.e. snow and ice surfaces) and  
30 the second one is found on the crest of the lateral moraine (bare soil and snow  
31 surfaces) which present a horizontal surface and a sky view factor of 0.98. The results,  
32 at daily time steps (256 days), given by the LCA are in good agreement with the classic  
33 albedo measurements taken with pyranometers with  $R^2 = 0.83$  (RMSE = 0.10) and  $R^2$   
34 = 0.92 (RMSE = 0.08) for the Zongo Glacier and the right-hand side lateral moraine,  
35 respectively. This demonstrates that our system performs well and thus provides  
36 relevant opportunities to document spatio-temporal changes in the surface albedo from  
37 direct observations at the scale of an entire catchment at a low cost. Finally, during the  
38 period from September 2015 to June 2016, direct observations were collected with 15

39 LCAs on the Zongo Glacier and successfully compared with LANDSAT images  
40 showing the surface **conditions** of the glacier (i.e snow or ice). This comparison  
41 illustrates the efficiency of this system to monitor the daily time step changes in the  
42 snow/ice coverage distributed on the glacier. **Despite the limits imposed by the angle**  
43 **view restrictions, the LCA can be used between 45°N and 45°S during the ablation**  
44 **season (spring and summer) when the melt rate related to the albedo is the most**  
45 **important.**

46 **Keywords:** Snow; Ice; Albedo; Glacier, Bolivia

## 47 **1-Introduction**

48 Albedo is a key variable controlling the surface energy balance through the shortwave  
49 radiation budget. Documenting the spatio-temporal changes of this variable is a major  
50 concern in hydrological modeling particularly in mountainous regions where the  
51 seasonal snow and glacier covers induce significant and rapid changes in the surface  
52 state with subsequent impacts on the energy budget. Hereafter, the spectral albedo is  
53 defined as the ratio between the amount of energy reflected by the surface and the  
54 incident energy for each wavelength of the solar spectrum (between 0.3 and 2.5  $\mu\text{m}$ );  
55 and the broadband albedo is the integration of the spectral albedo weighted by the  
56 incident energy over the entire solar spectrum (0.3-2.5  $\mu\text{m}$ ). The amount of shortwave  
57 radiation absorbed by the surface depends on the spectral and angular distribution of  
58 the incident shortwave radiation and the surface characteristics, both of which are  
59 highly variable in space and time (Stroeve *et al.*, 1997; Klok *et al.*, 2003). Clouds alter  
60 the angular and spectral properties of the incident radiation. With respect to the snow  
61 and ice surfaces, the albedo in the visible wavelength depends on the snow and ice  
62 properties, the impurity amount (e.g. black carbon, dust, algae, etc.) and the snow

63 depth for the shallow snowpack. In the infrared portion of the spectrum, the albedo is  
64 mainly controlled by the snow microstructure and is moderately sensitive to the solar  
65 zenith angle (Warren, 1982). Liquid water and land have relatively low albedos (roughly  
66 0.1 to 0.4) while snow and ice have higher albedos that typically can reach 0.9 for fresh  
67 snow. It is still challenging to measure the temporal and spatial changes in the surface  
68 albedo from the scale of specific points up to a regional scale. Different methods are  
69 commonly used to retrieve albedo values from satellite images, ground photographs  
70 or point measurements with pyranometers. Satellite-derived albedo maps provide  
71 spatially continuous datasets but are limited to clear sky conditions; these maps may  
72 contain significant uncertainties, especially over complex topographies (Stroeve *et al.*,  
73 1997; Klok *et al.*, 2003; Dumont *et al.*, 2012), and provide averaged data over a pixel  
74 size of hundreds of square meters. Ground photography using pairs of photographs in  
75 the visible and infrared wavelengths is used to collect albedo maps that have a higher  
76 spatial resolution than satellite images but which are limited by cloudy conditions, the  
77 possible masking of the relief, an irregular grid due to the projection and more complex  
78 ortho-rectification processes in mountainous regions (e.g. Corripio, 2004; Dumont *et al.*,  
79 2011). Finally, direct *in situ* snow and ice albedo measurements are sparse,  
80 relatively expensive, often discontinuous and may contain large uncertainties if the  
81 sensor is not regularly checked (Sicart *et al.*, 2001, van den Broeke *et al.*, 2004).

82 A study published by Brock *et al.* (2000) aimed to document the spatial and temporal  
83 variations of surface albedo on the Haut Glacier d'Arolla, Swizerland during the 1993  
84 and 1994 ablation seasons (from the mid-May to the end of August). They used  
85 traditional Kipp and Zonen CM7B albedometer (that is expensive) and relied the  
86 temporal variations of albedo with surface conditions as snow depth, surface snow  
87 density and surface snow grain-size. One of their conclusions underlined the

88 importance to conduct in-situ field measurements continuously at daily time scale  
89 across a glacier throughout the ablation season, as the measurements are crucial to  
90 develop albedo parametrization into hydro-glaciological models.

91 This article analyzes the efficiency of a low-cost albedometer (hereafter called LCA)  
92 that measures the time series of *in-situ* incident and reflected illuminance values which  
93 are used to calculate an accurate proxy of the albedo values called the *albedo index*.  
94 The illuminance is the total luminous flux incident on a surface, per unit area. It is a  
95 measure of how much the incident light illuminates the surface, wavelength-weighted  
96 by the luminosity function to correlate with the human perception of brightness. In  
97 section 2, we present the characteristics of and uncertainties on the LCA  
98 measurements along with a comparison with the theoretical values for 10 different ice  
99 and snow states and for two different incident irradiance spectra (cloudy or clear sky).  
100 Then, section 3 presents two experiments carried out on a high-altitude tropical  
101 mountain site in Bolivia (Zongo glacierized catchment). A first application for punctual  
102 *in situ* measurements validates the LCA in the field via a comparison with traditional  
103 radiometers for two contrasting surfaces: snow/ice on the glacier or snow/bare soil on  
104 the moraine. After that, a second application on the same glacier documents the  
105 snow/ice changes on the surface of the glacier during the period that extends from  
106 September 2015 to June 2016.

## 107 **2- LCA description and evaluation with theoretical albedo values for snow and** 108 **ice surfaces**

109 The LCA is comprised of two HOBO® Pendant Temperature/Light Data Loggers: one  
110 for the incident illuminance and the other for the reflected illuminance (Fig. 1). The  
111 sensor characteristics are given in Table 1. This sensor measures the illuminance in  
112 lux and the measurement range is between 0 and 320,000 lux. The lux quantifies the

113 light incident flux per unit area. One lux equals one lumen per square meter with a  
114 uniform distribution. In photometry, this unit is used as a measure of the intensity of  
115 the light hitting or passing through a surface as perceived by the human eye. The  
116 illuminance may be related to an energy quantified in watts per square meter ( $W/m^2$ ),  
117 but the conversion factor differs depending on the wavelength considered according to  
118 the luminosity function, a standardized model of the human visual perception of  
119 brightness. As a consequence, the illuminance depends on the spectral distribution of  
120 the incident light. Due to its operating temperature range (see table 1), the use of the  
121 LCA is limited at very cold locations where the temperature falls continuously below -  
122  $20^{\circ}C$  for long periods of time. However, this may not be too critical since the main  
123 purpose of the device is to document albedo surface changes during melt periods when  
124 such low temperature conditions are not typical.

125

126

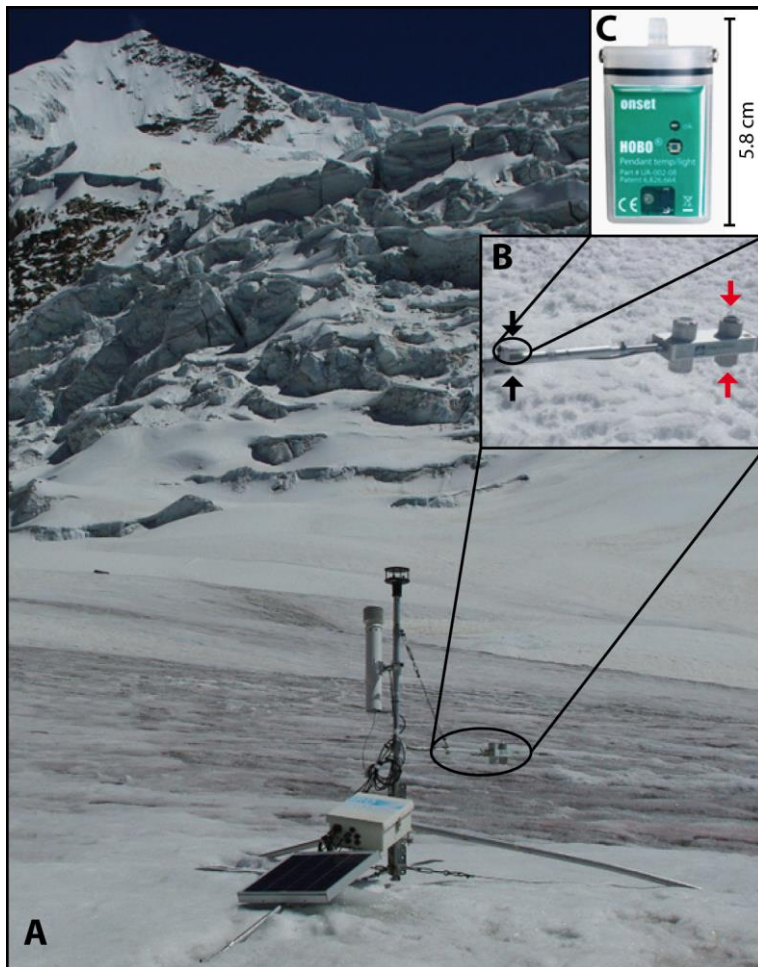

127

128 **Figure 1:** A) Meteorological station on the Zongo Glacier; B) CNR1 radiometer (Kipp & Zonen) installed  
 129 at the SAMA meteorological station (the CM3 pyranometers are the two sensors on the right, red arrows)  
 130 and the LCA comprised of two **HOBO®** Pendant Temperature/Light Data Loggers (black arrows); C)  
 131 Zoom on a **HOBO®** Pendant Temperature/Light Data Logger (see Table 1 for detailed characteristics).

132 The spectral range of the **HOBO®** Pendant Temperature/Light Data Logger is **0.26** to  
 133 **1.195**  $\mu\text{m}$  (see Fig. 2). The spectral response of the sensor represents the amount of  
 134 incoming signal recorded by the sensor for any given wavelength and is reported in  
 135 Figure 2. **This figure** shows that the spectral response of the sensor increases from 20  
 136 to 100% between **0.26** and **0.915**  $\mu\text{m}$  and then decreases until the upper limit of the  
 137 sensor sensitivity (i.e. **1.195**  $\mu\text{m}$ ). The sensor detects roughly 85% of the total solar  
 138 irradiance for clear sky conditions (Fig. 2). Laboratory tests conducted with a  
 139 goniometer showed that the **HOBO®** Pendant Temperature/Light Data Logger cannot

140 measure the irradiance for incident zenith angles ranging from 55° to 90° (+/- 2°, where  
 141 0° is the vertical illumination). This is due to the design of the sensor (Fig. 1C).  
 142 Traditionally, the *in situ* albedo is measured using a CM3 pyranometer (Kipp & Zonen®)  
 143 in the shortwave domain from 0.305 to 2.800 μm (Fig. 1B). The CM3 is part of the  
 144 CNR1/CNR4 net radiometer, which is intended for the analysis of the radiation balance  
 145 of solar and thermal infrared radiation. The design of the CM3 is such that the upward-  
 146 facing and downward-facing sensors measure the energy received from the entire  
 147 hemisphere (a field of view of almost 180 degrees). The output is expressed in W/m<sup>2</sup>.  
 148 The CM3 sensor has a 100% response for wavelengths between 0.305 to 2.8 μm (Fig.  
 149 2).

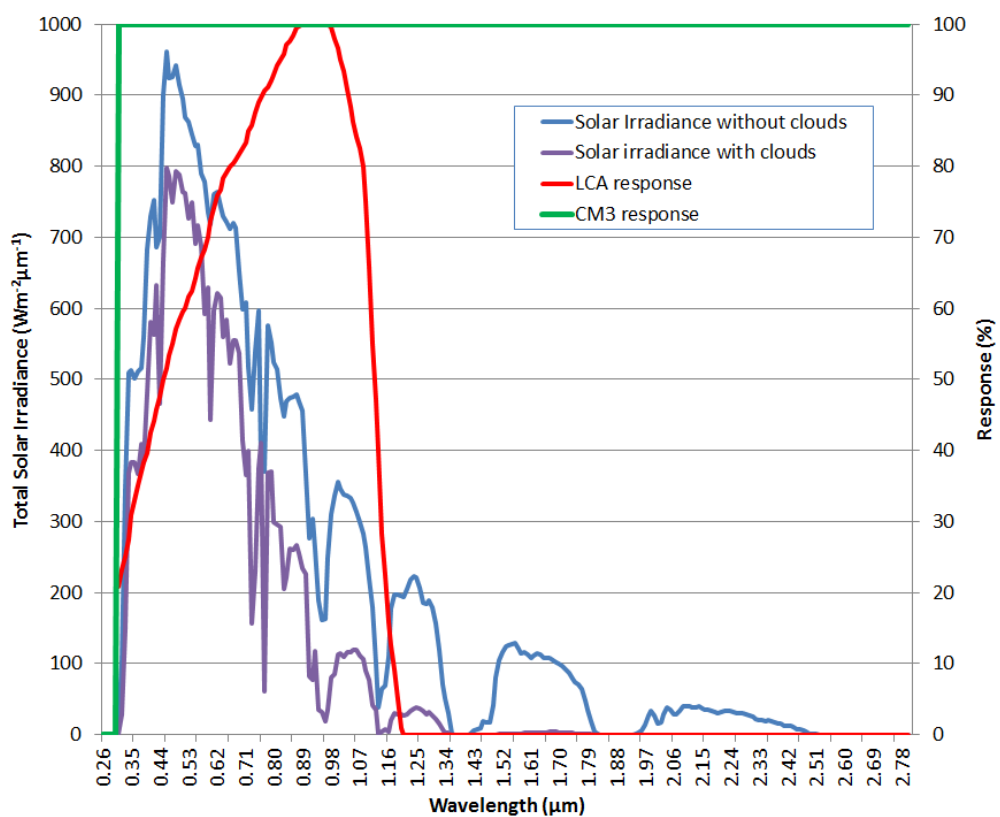



151 **Figure 2:** *HOBO® Pendant Temperature/Light Data Logger and CM3 responses as a function*  
 152 *of the wavelength and two examples of total solar irradiances for a clear sky in blue and for a cloudy sky*  
 153 *in purple given by the DISORT model (Stamnes et al., 1988) ( $Wm^2\mu m^{-1}$ )*

154 **Table 1:** *Characteristics of the HOBO® Pendant Temperature/Light Data Logger sensor as per*  
 155 *the manufacturer*

|                 |                                                                                                                                              |
|-----------------|----------------------------------------------------------------------------------------------------------------------------------------------|
| Measurement     | Temperature: -20° to 70°C                                                                                                                    |
| Range           | Light: 0 to 320,000 lux                                                                                                                      |
| Accuracy        | Temperature: +/- 0.53°C<br>Light intensity designed for measurement of relative light levels, see Figure 2 for the light wavelength response |
| Resolution      | Temperature: 0.14°C at 25°C                                                                                                                  |
| Time accuracy   | +/- 1 minute per month at 25°C                                                                                                               |
| Operating range | in air: -20° to 70°C                                                                                                                         |
| Battery life    | 1 year typical use                                                                                                                           |
| Memory          | 64 K bytes                                                                                                                                   |
| Material        | Polypropylene case; stainless steel screws; Buna-N o-ring                                                                                    |
| Weight          | 18 g                                                                                                                                         |
| Dimensions      | 58 x 33 x 23 mm                                                                                                                              |

156

157 It is noteworthy that the LCA contains an internal memory; this is not the case for the  
 158 CM3 pyranometers, which need to be connected to an external module for data  
 159 acquisition programming and data storage. The LCA cannot provide direct access to  
 160 the albedo as its response is not constant depending on the wavelength in the solar  
 161 spectrum. Finally, the conversion from illuminance to radiation in  $W/m^2$  is not  
 162 straightforward since it depends on the spectral **distribution** of the incident and  
 163 reflected light.

164

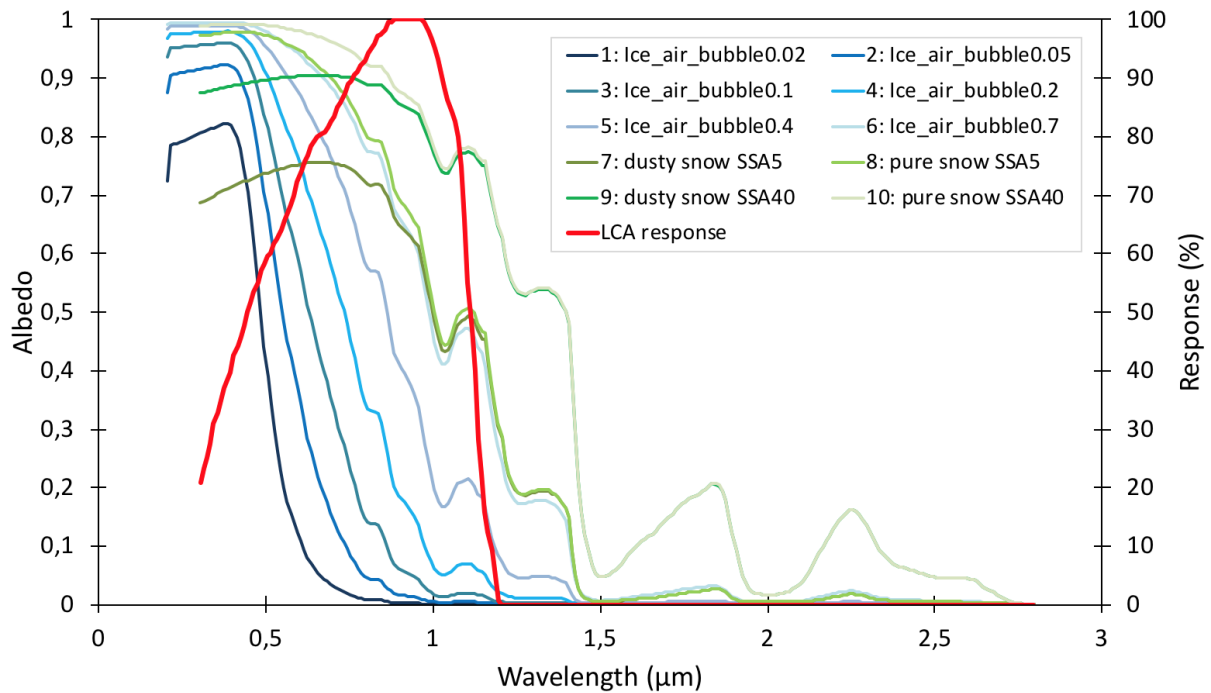

165

166 **Figure 3:** Semi-infinite diffuse beam albedo of pure ice as a function of the effective air bubble radius  
 167 (mm) with a constant effective bubble concentration  $n'_e = 0.3 \text{ mm}^{-3}$ . Here  $0.3 \text{ mm}^{-3}$  is the mean bubble  
 168 concentration determined from 28 Greenland and Antarctica ice core samples (Gardner and Sharp,  
 169 2010) - Semi-infinite diffuse beam albedo of dusty and pure snow from DISORT modelling with or without  
 170 dust and with a specific surface area (SSA) equal to 40 or  $5 \text{ m}^2 \text{ kg}^{-1}$  [Stamnes et al., 1988; Carmagnola  
 171 et al., 2013]. The red line shows the LCA response in %.

172 Figure 3 shows 10 simulated spectral albedo curves for different glacier surfaces, four  
 173 for snow (with dusty or pure snow and with a specific surface area (SSA) equal to 5 or  
 174  $40 \text{ m}^2 \text{ kg}^{-1}$ ) and six for ice with different bubble concentrations (see Gardner and Sharp,  
 175 2010 for details). These 10 different surface types are used below to calculate the  
 176 theoretical uncertainty of the LCA measurements.

177 In the visible domain, the spectral albedo of pure snow is high (0.95) and the albedo  
 178 decreases in the infrared towards 0.1 for longer wavelengths (1.5-2  $\mu\text{m}$ ) (Fig. 3). For  
 179 dusty snow, the spectral albedo is lower than for pure snow. To calculate the  
 180 uncertainty for the ice covers, we chose pure ice that only contains air bubbles and no

181 impurity taken from the study of Gardner and Sharp (2010). In this case, all of the  
182 photon absorption events will occur within the ice and all of the scattering will occur at  
183 the ice-bubble boundaries, thereby neglecting all surface reflection as well as internal  
184 scattering and absorption by the interstitial air (Mullen and Warren, 1988; Warren *et*  
185 *al.*, 2002).

186 Two types of incident radiations are tested (clear sky and cloudy conditions given by  
187 the SBDART model for the tropical Zongo latitude at 5000 m a.s.l., 23° solar zenith  
188 angle, 0.1 atmospheric optical depth), (see Richiazzi *et al.*, 1998 for details  
189 concerning the model). The cloudy conditions are fully overcast with an optical depth  
190 of 64.

191 The theoretical broadband albedo and LCA albedo indexes are calculated over the  
192 0.205-3.9  $\mu\text{m}$  range using the theoretical solar irradiance, the LCA spectral response  
193 from Figure 2, and the semi-infinite diffuse beam albedo from Figure 3. The total  
194 incident radiation flux for LCA,  $S_{inc}$  (in  $\text{W m}^{-2}$ ), is obtained by summing the theoretical  
195 incident radiation fluxes,  $S_{inc-th}(\lambda)$  (in  $\text{W m}^{-2} \mu\text{m}^{-1}$ ), weighted by the LCA response,  $R_\lambda$  (-  
196 ), at each spectral increment of 5  $\mu\text{m}$  for both cloudy and clear sky conditions (Eq. 1).

$$197 \quad S_{inc} = \sum_{\lambda=0.205}^{3.9} S_{inc-th}(\lambda) R_\lambda d\lambda \quad (\text{Eq. 1})$$

198 Similarly, the reflected radiation flux for the LCA,  $S_{ref}$  (in  $\text{W m}^{-2}$ ), is obtained by  
199 summing the theoretical reflected radiation fluxes,  $S_{ref-th}(\lambda)$  (in  $\text{W m}^{-2} \mu\text{m}^{-1}$ ), weighted  
200 by the LCA response,  $R_\lambda$  (-), at each spectral increment of 5  $\mu\text{m}$  for each snow or ice  
201 class considered (Eq. 2).

$$202 \quad S_{ref} = \sum_{\lambda=0.205}^{3.9} S_{ref-th}(\lambda) R_\lambda d\lambda \quad (\text{Eq. 2})$$

203 Then, the LCA albedo index,  $Albedo_{index}$  (-), is the ratio between the reflected and  
204 incident LCA radiation fluxes for each type of snow and ice surface and for cloudy or  
205 clear sky conditions (Eq. 3).

206  $Albedo_{index} = \frac{S_{ref}}{S_{inc}}$  (Eq. 3)

207 Finally, this LCA *albedo index* is compared with the theoretical broadband albedo when  
208 we consider the spectral variations. Note that the results are presented with the  
209 incoming radiation corresponding to the total solar irradiances for clear sky and cloudy  
210 sky conditions and without testing the effect of the angular limitation of the LCA.

211

212

213

214

215

216

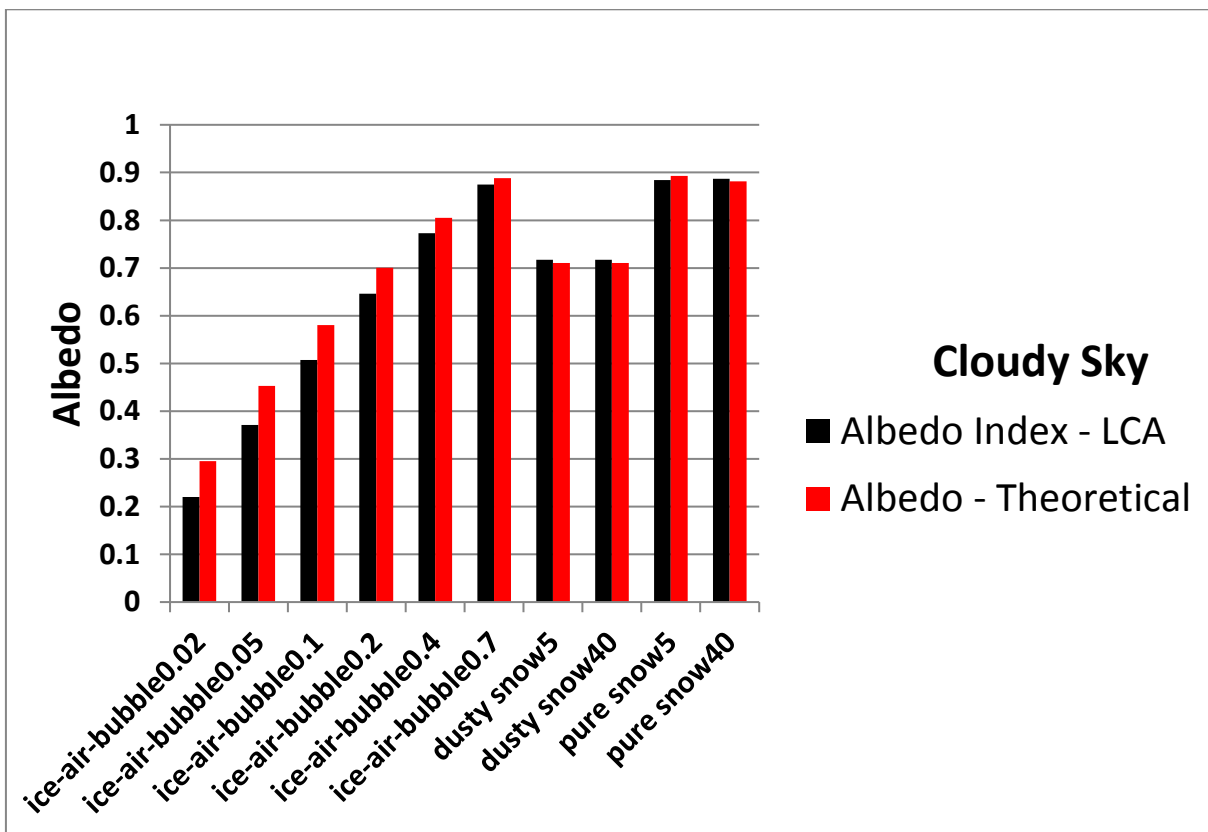

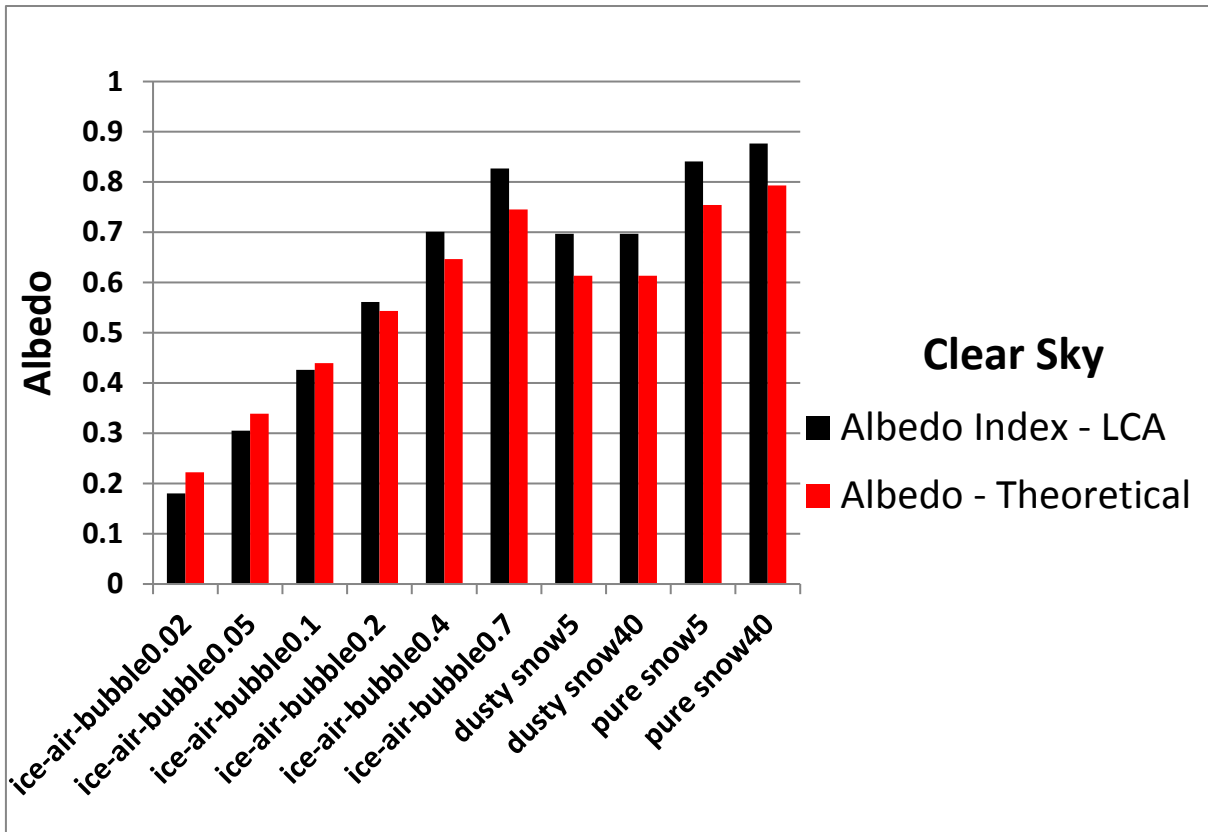

217 **Figure 4:** Comparison between the theoretical semi-infinite diffuse beam broadband albedo  
 218 and LCA albedo index theoretically estimated based on spectral response of the LCA for 10 different  
 219 surfaces calculated with two kinds of total solar irradiance (see the text for the calculation); on the right:  
 220 cloudy sky and on the left: clear sky conditions (spectra are represented in Fig. 2) - 1: Ice air bubble  
 221 0.02; 2: Ice air bubble 0.05; 3: Ice air bubble 0.1; 4: Ice air bubble 0.2; 5: Ice air bubble 0.4; 6: Ice air  
 222 bubble 0.7; 7: dusty snow SSA 5 m<sup>2</sup> kg<sup>-1</sup>; 8: dusty snow SSA 40 m<sup>2</sup> kg<sup>-1</sup>; 9: pure snow SSA 5 m<sup>2</sup> kg<sup>-1</sup>;  
 223 10: pure snow SSA 40 m<sup>2</sup> kg<sup>-1</sup>

224 Figure 4 compares the theoretical albedos and the LCA *albedo index* with the  
 225 theoretical perfect albedo for the 10 surface configurations and for clear and cloudy  
 226 skies. Slight differences exist for ice with a bubble radius between 0.02 and 0.2 mm  
 227 with an underestimation of the LCA by 4% for a clear sky. For ice with an air bubble  
 228 radius of 0.4 or 0.7 mm and for the two snow types (dusty and pure), the LCA tends to  
 229 overestimate the albedo by 8% in average for clear sky conditions. The LCA tends to  
 230 overestimate for albedo values higher than 0.5 (typically for snow) and to

231 underestimate for low values (i.e. for ice). A better agreement between the **theoretical**  
232 **albedos and the LCA albedo index** is given in the cloudy case with an overall  
233 underestimation of 5% compared with 9% for the clear sky case. This is explained by  
234 the response of the LCA based on the wavelength, which is null for the 1.20-2.30  $\mu\text{m}$   
235 range (see Fig. 2).

### 236 **3-Applications on a high tropical glacierized catchment in Bolivia**

237 The Zongo Glacier ( $16^{\circ}15'S$ ,  $68^{\circ}10'W$ ) is located in the Bolivian Cordillera Real (Fig.  
238 5) between the Altiplano Plateau in the west and the Amazon Basin in the east. In  
239 2006, the glacier covered an area of 1.96  $\text{km}^2$  extending from 6100 to 4900 m a.s.l.  
240 (Rabatel *et al.*, 2012). **For the whole glacier, the main precipitation type is solid and the**  
241 **albedo increases after each snowfall with a snowline that could reach the front of the**  
242 **glacier. After that, during dry consecutive days the snowline rises up due to the snow**  
243 **melting processes.** The Bolivian Cordillera Real is located in the outer tropical zone,  
244 which forms a transition zone between the tropics (continuously humid conditions) and  
245 the subtropics (dry conditions). The climate of the outer tropics is characterized by low  
246 seasonal temperature variability, high solar radiation influx all year round and marked  
247 seasonal humidity and precipitation. The hydrological year (from September 1<sup>st</sup> to  
248 August 31<sup>st</sup>) can be divided into three periods: (1) September–December, with a  
249 progressive increase in moisture and precipitation; (2) January–April, which is the core  
250 period of the rainy season (approximately two-thirds of the total annual precipitation);  
251 and (3) May–August, when dry conditions prevail (e.g. Sicart *et al.*, 2011). However,  
252 precipitation can also occur during the dry period due to Southern Hemisphere mid-  
253 latitude disturbances that track much further north of their usual path (e.g. Vuille and  
254 Ammann, 1997; Sicart *et al.*, 2016).

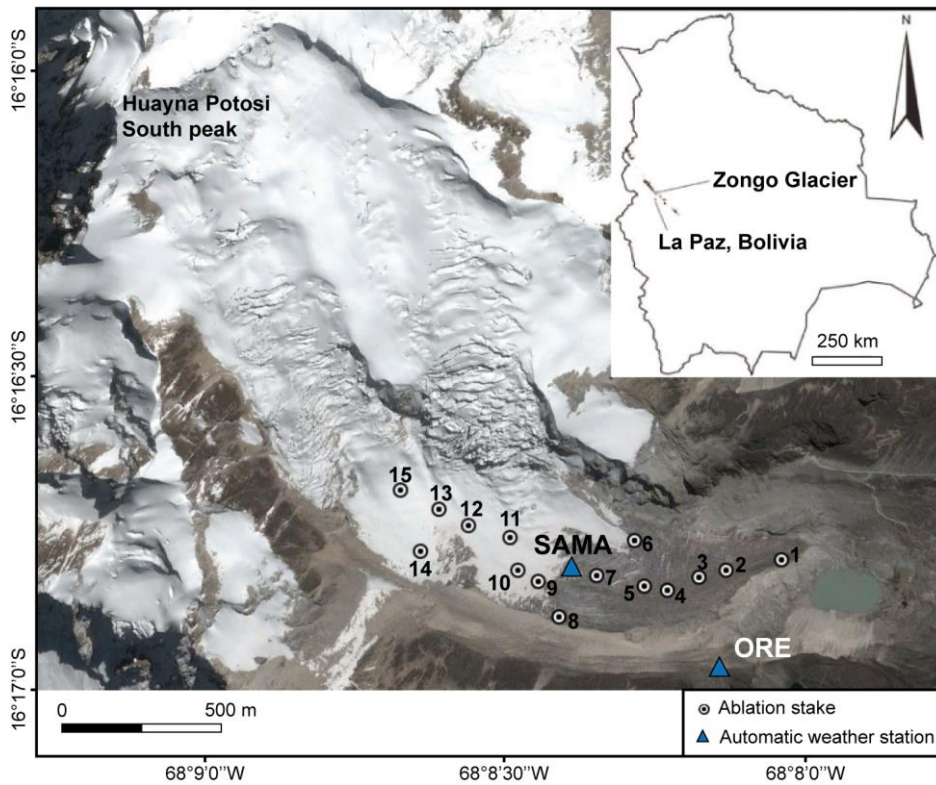

255

256 **Figure 5:** Study site with the Zongo Glacier and the location of the meteorological stations: ORE (5050  
 257 m a.s.l.) outside of the glacier and SAMA (5056 m a.s.l.) on the glacier. The numbers indicate the  
 258 position of each in situ LCA on ablation stakes.

259 Two contrasting sites with different characteristics were chosen in order to evaluate  
 260 the efficiency of the LCA (Figure 5). These two sites belong to the GLACIOCLIM  
 261 observatory (<https://glacioclim.osug.fr/>) which has maintained a permanent glacio-  
 262 meteo-hydrological monitoring program on the Zongo Glacier since 1991 (Rabatel *et*  
 263 *al.*, 2013). The SAMA station is an automatic weather station (AWS) located on the  
 264 Zongo Glacier (Figures. 1, 5) and the ORE station is a similar AWS located on the **crest**  
 265 **of the lateral** moraine. In order to capture the sky view for each station, ORE and  
 266 SAMA, a digital elevation model (DEM) at 30-m resolution taken from ASTER images  
 267 (Tachikawa *et al.*, 2011) was used. The sky view factor, which is the fraction of the  
 268 celestial hemisphere visible from the surface defined by the local slope, was calculated  
 269 with the SAGA GIS software (System for Automated Geoscientific Analyses,

270 version 2.0.8) using the code provided by Boehner and Antonic (2009). The sky view  
271 factors obtained are 0.92 and 0.98 for the SAMA and ORE stations, respectively.

272 Considering the limited field of view of the **HOBO**<sup>®</sup> Pendant Temperature/Light  
273 Data Logger, daily albedo values are calculated between 11:00 AM and 3:00 PM local  
274 time, ensuring that direct solar irradiance is caught by the two sensors. The *albedo*  
275 *index* is calculated in two steps: (i) the sum of the hourly data for the incident  
276 illuminance and the reflected illuminance between 11:00 AM and 3:00 PM; and (ii) the  
277 calculation of the daily *albedo index* by dividing the **sum of reflected values by the sum**  
278 **of incident illuminance values**. The time series used for the ORE and SAMA stations  
279 are 07/11/2012-06/03/2013 and 01/12/2012- 9/10/2013 respectively. Figures 6A and  
280 6B show the comparison between the CM3 albedo and LCA *albedo indexes* for the  
281 daily values that range between 0.15 (dirty ice or bare soil) and 0.95 (fresh snow).

282

283

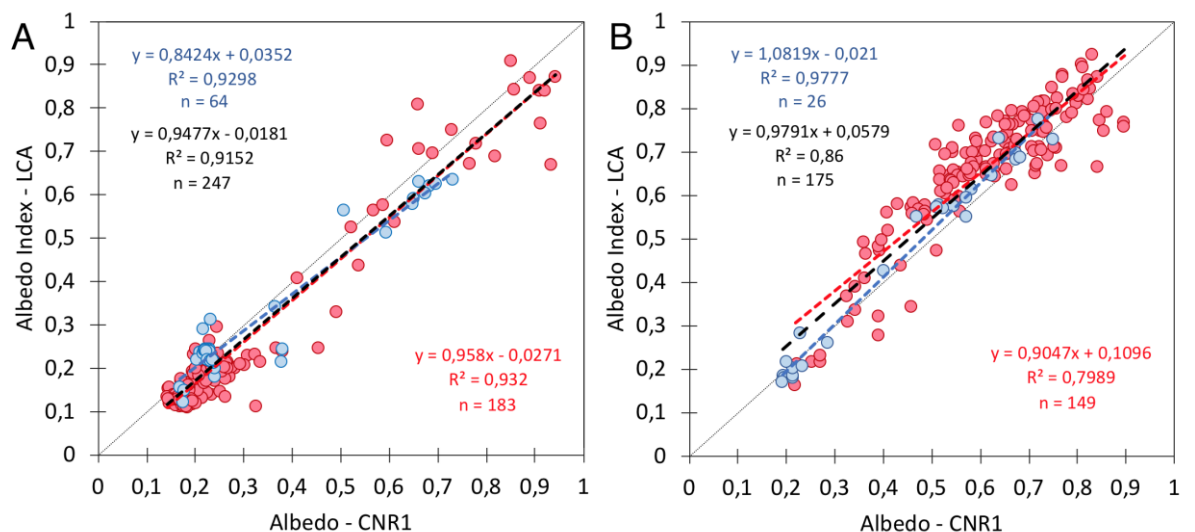

284

285 **Figure 6: A Comparison of the daily measured albedo at the ORE site using the CNR1 radiometer and**  
286 **the LCA for the period from 07/11/2012 to 06/03/2013 – daily data calculated from 11AM to 3PM – ORE;**



287 *RMSD = 0.1; n = 247. **B** Comparison of the daily measured albedo at the SAMA site on the Zongo*  
288 *Glacier using the CM3 sensor and LCA for the period from 01/12/2012 to 9/10/2013 – daily data*  
289 *calculated from 11AM to 3PM; RMSD = 0.08; n = 175. The red dots are for cloudy conditions and the*  
290 *white dots are for sunny conditions, as per the classification given by Sicart et al. (2016). The calculated*  
291 *regression lines are shown in red for cloudy conditions, blue for sunny conditions, and black for all*  
292 *conditions. The dotted lines represent the bisectors.*

293 At the ORE site (Figure 6A), two groups of points can be distinguished. The lower  
294 group (albedo close to 0.25) corresponds to measurements over bare soil. For the  
295 second group, the broadband albedo and *albedo indexes* range from 0.3 to 0.9,  
296 corresponding to several snow cover conditions: (i) thin and dirty snow; (ii)  
297 homogeneous fresh snow; and (iii) patchy snow covers. There is good agreement  
298 between the CM3 broadband albedos and LCA broadband *albedo indexes* ( $R^2 = 0.90$   
299 and  $RMSD = 0.08$ , with 256 days). The distribution for the albedos at the SAMA site  
300 (Figure 6B) is more homogeneous. For the SAMA site, the albedo variations are due  
301 to surface changes from ice to fresh snow. At this second site, there is also good  
302 agreement between the CM3 and LCA albedo ( $R^2 = 0.93$  and  $RMSD = 0.08$ , with 256  
303 days).

304 The measurements are separated into two groups according to the sky conditions,  
305 cloudy or sunny, as per the classification provided by Sicart et al. (2016). If we consider  
306 the theoretical results from section 2, the LCA should give better results for cloudy  
307 conditions; however there are not enough measurements for clear sky conditions  
308 compared with the number of measurements for cloudy conditions to be able to come  
309 to a conclusion. In both cases, the LCA tends to slightly overestimate the albedo values  
310 by 5%. This result is in good agreement with the theoretical results presented in  
311 Section 2 (Figure 4) showing that the LCA tends to overestimate the theoretical albedo  
312 values for ice with bubbles and snow by less than 10%. The results are in good

313 agreement with the theoretical results obtained in section 2, with an overestimation for  
314 the high albedos and an underestimation for the low albedos.

315 After the comparison between the CM3 and LCA, a second field experiment was  
316 carried out in order to determine the spatio-temporal variability of the snow cover on  
317 the Zongo Glacier during the period from 09/21/2015 to 06/30/2016. Fifteen LCA  
318 stations were installed on ablation stakes distributed in the lower and middle part of  
319 the glacier at altitudes ranging between 4929 and 5184 m a.s.l. (Figure 5). In order to  
320 evaluate whether the LCA provides coherent information on the spatio-temporal  
321 changes in the surface state of the glacier (fresh snow, old snow, ice), we compared  
322 the LCA data with information retrieved from the LANDSAT images. With regards to  
323 the LANDSAT images (30-m resolution), we first selected, within the archive, the cloud  
324 free images recorded within the period when the LCA data were available (a list of the  
325 23 images used here is provided in Table 2). On the LANDSAT images, we used a  
326 spectral band combination involving the green, near-infrared (NIR) and middle infrared  
327 (MIR) wavelengths (spectral bands # 2, 4 and 5 for LANDSAT images 5 and 7) which  
328 is used to make a clear differentiation between snow and ice surfaces (Rabatel *et al.*,  
329 2012). Then, according to the values in the NIR and MIR bands, the pixels where the  
330 LCA are located were classified as snow covered (value of 2 in Figure 7) or ice covered  
331 (value of 1 in Figure 7). In one case, the chosen value was 1.5 as the pixel showed  
332 patchy snow cover. This can be explained if we consider that the spatial resolution of  
333 the LANDSAT is equal to 900 m<sup>2</sup> and the surface view by the sensor is less than 1 m<sup>2</sup>.

334 *Table 2: Date of the LANDSAT images used in the present study (Path/Row = 001/071)*  
335 *(images from the web site: <https://landsatlook.usgs.gov/viewer.html>)*

| Date of the<br>LANDSAT images | No. |
|-------------------------------|-----|
|-------------------------------|-----|

|            |    |
|------------|----|
| 10/18/2015 | 1  |
| 11/03/2015 | 2  |
| 11/11/2015 | 3  |
| 11/19/2015 | 4  |
| 12/05/2015 | 5  |
| 12/13/2015 | 6  |
| 01/06/2016 | 7  |
| 01/14/2016 | 8  |
| 01/22/2016 | 9  |
| 02/15/2016 | 10 |
| 03/18/2016 | 11 |
| 03/26/2016 | 12 |
| 04/03/2016 | 13 |
| 04/11/2016 | 14 |
| 04/27/2016 | 15 |
| 05/13/2016 | 16 |
| 05/21/2016 | 17 |
| 05/29/2016 | 18 |
| 06/06/2016 | 19 |
| 06/14/2016 | 20 |
| 06/22/2016 | 21 |
| 06/30/2016 | 22 |
| 07/08/2016 | 23 |

336

337

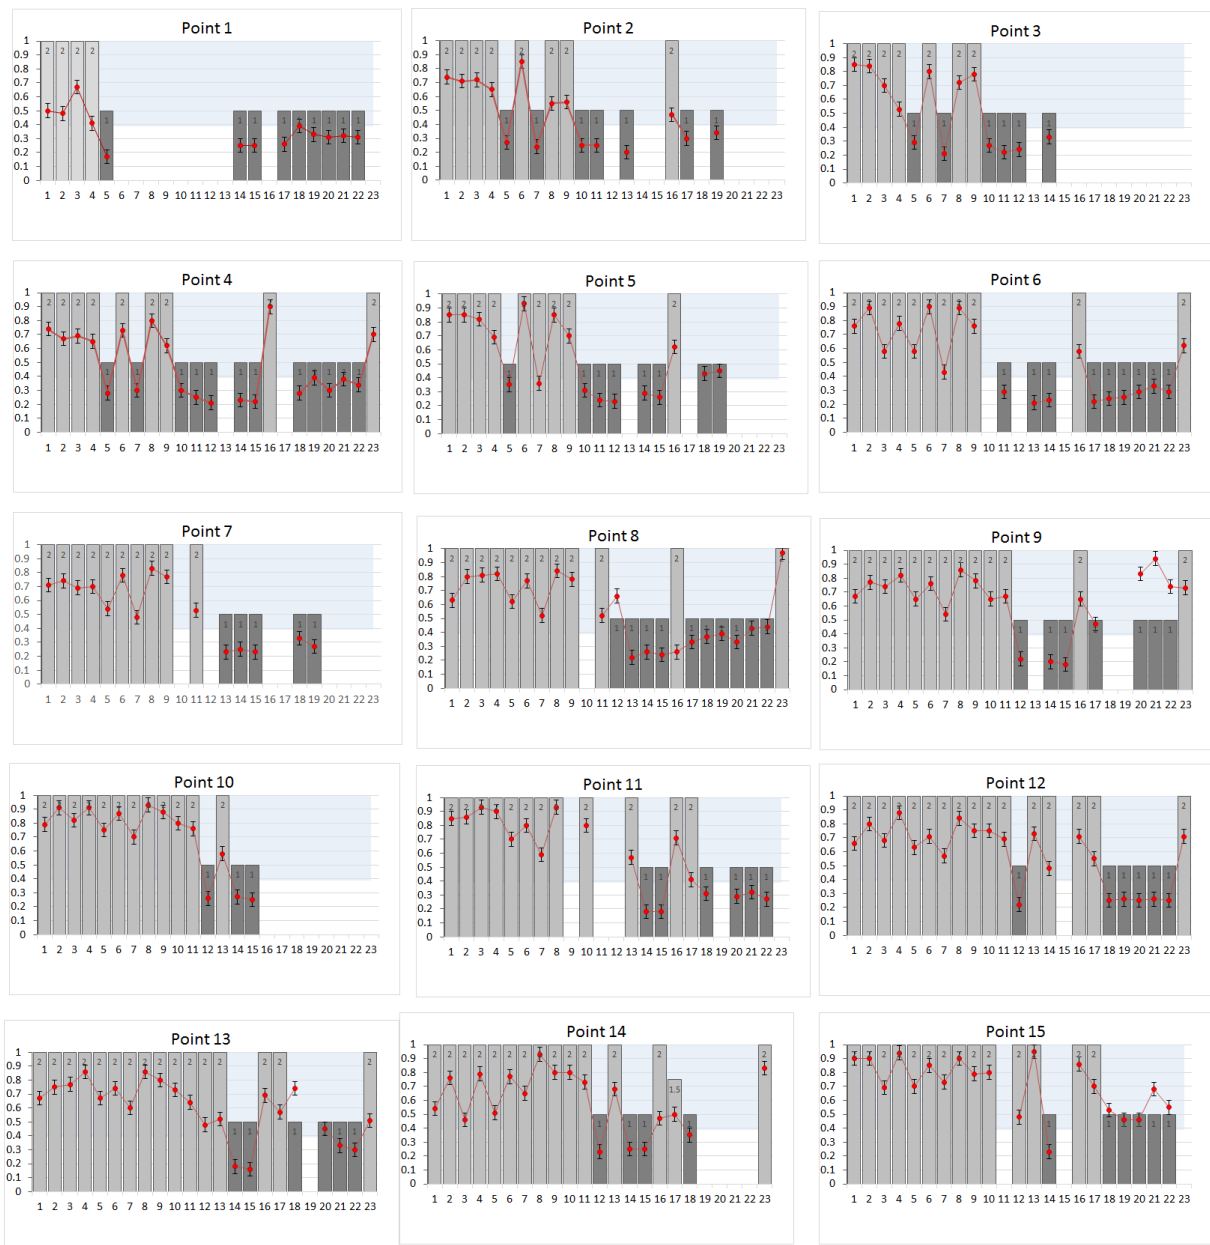

338

339 *Figure 7: Comparison between the LCA measurements and the 23 LANDSAT images (from*  
 340 *10/18/2015 to 06/30/2016, the numbers for the X axis are the image numbers, see Table 2 for the*  
 341 *correspondence) for the 15 points on the Zongo Glacier (see Figure 5 for the locations of the LCA). The*  
 342 *red points represent the albedo index value calculated with the LCA and the grey bars indicate the*  
 343 *surface state for the corresponding pixel (1: ice and 2: snow). A value of 1.5 was chosen for stake*  
 344 *number 14 as the pixel showed patchy snow cover.*

345 The LCA network was deployed in the lower and middle part of the Zongo Glacier  
 346 (Figure 5) which is the zone where the snowline altitude goes up or down depending

347 on the snowfall events and ablation processes. For all of the points, we identified a first  
348 period (10/18/2015 to 11/11/2015) with high albedo values comprised between 0.40  
349 and 0.92. These values are in agreement with the surface state of the glacier on the  
350 LANDSAT images where the pixels of the glacier tongue are all snow covered. During  
351 the second period, the glacier surface is covered by ice or by snow depending on the  
352 altitude. In further detail, we identified three groups organized by altitude ranges  
353 depending on the changes in the surface state of the glacier with a first group in the  
354 lower part of the glacier (LCA numbers 1, 2, 3, 4, 5), a second group in the middle part  
355 of the glacier (LCA numbers 6, 7, 8, 9, 10, 11, 12) and a third group with LCA numbers  
356 13, 14, 15 (see Figure 5 for the location). Finally, the comparisons between the *in situ*  
357 LCA measurements and the surface state given by the LANDSAT images were used  
358 to visually identify a threshold for the *albedo index* equal to 0.39 between snow and  
359 ice. These results are in agreement with those obtained by Sicart *et al.* (2001) which  
360 showed that the albedo for the Zongo Glacier ranges from 0.3 for dirty ice to 0.9 for  
361 fresh snow. Using this threshold, it is possible to plot the evolution of the glacier cover  
362 (even ice or snow) over time for different altitudes ranging from 4929 m a.s.l. to 5184  
363 m a.s.l. (figure 8).

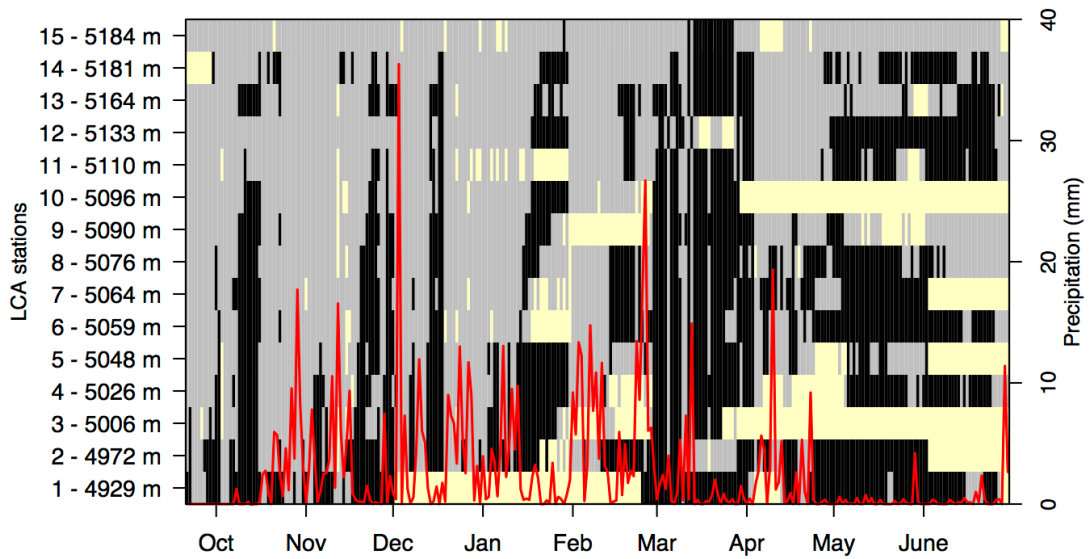

364

365 **Figure 8:** Daily albedo index for the 15 LCA stations during the period from 09/21/2015 to  
 366 06/30/2016, in yellow: missing data; binary values considering the separation between ice (1: in black)  
 367 and snow (2: in grey) with a threshold equal to 0.39. In red, the daily precipitation amount measured by  
 368 the GEONOR rain gauge at the ORE station (mm/day).

369 Figure 8 gives the evolution of the albedo for the 15 points during the period  
 370 09/21/2015-06/30/2016 as well as the precipitation amount measured by a GEONOR  
 371 precipitation gauge at the ORE station (Figure 5). We can clearly identify the snowfall  
 372 events and see how the snow disappears thus leaving the glacier ice exposed. As a  
 373 result, the snowline altitude variations can be defined and vary between 4929 and 5184  
 374 m a.s.l. depending on the period of the year. In further detail, it can be noted that at the  
 375 beginning of the study period (i.e. between September and November), the snowline  
 376 quickly rises up and goes down due to intermittent precipitation events. Then, during  
 377 the rainy season (from December to March), the glacier is mostly snow-covered  
 378 (mainly above 5000 m a.s.l.). Finally, during the dry season (April to June), the  
 379 snowline rises up to 5150 m a.s.l. and the glacier tongue is mainly snow free.

#### 380 4- Discussion and conclusion

381 In this study we developed, evaluated and tested a new low-cost albedometer (LCA)  
382 comprised of two HOBO® Pendant Temperature/Light Data Loggers, measuring  
383 downward and upward illuminances. The measurements of the field of view of the LCA  
384 in the laboratory with a goniometer showed that the LCA cannot capture the radiation  
385 for zenith angles ranging from 55° to 90° (+/- 2°). The angle of view of the sensor is  
386 55°; which limits where and when it can be used. To determine these limits, we  
387 calculated what the solar angle is at noon for different latitudes throughout the year.  
388 Considering the LCA is operational when the solar angle is greater than 55° at noon,  
389 it may be used all year long at latitudes between 12°N and 12°S, from March to October  
390 between 12°N and 30°N, and from September to March between 12°S and 30°S. The  
391 sensor cannot be used at latitudes higher than 60°N or 60°S at any time throughout  
392 the year. Between 45°N and 45°S the sensors can be operated during the ablation  
393 season when the glacier surface changes are the most important. Using the LCA  
394 spectral response (0.205 to 1.2 μm), we evaluated the simulated *albedo index* of the  
395 LCA over different types of snow and ice surfaces. The results showed that the LCA  
396 *albedo indexes* are within -4% to +8% of the theoretical broadband albedo values while  
397 considering that cloudy or clear sky incident irradiances only account only for the  
398 spectral response of the LCA and not for the angular response of the LCA with respect  
399 to the ideal response. In the second part of the study, we evaluated the LCA *albedo*  
400 *indexes* in the field using CM3 broadband albedo values at two different sites in a  
401 tropical mountain in Bolivia: on the Zongo Glacier, at one station located on the glacier  
402 and another one located on the moraine. Data were recorded at hourly time steps and  
403 then the albedo indices were calculated on a daily timescale (from 11:00 AM to 3:00  
404 PM). The daily *albedo indexes* from the LCA are in good agreement with the broadband

405 albedo values derived from the CM3 pyranometer. By comparing the LCA albedo  
406 estimates with the CM3 broadband albedo over a period of approximately 260 days at  
407 the two sites, we conclude that the efficiency of the *albedo indexes* given by the LCA  
408 is +/- 0.1 compared with classic CNR1 sensors. Future applications are certainly  
409 possible, especially considering the low cost, the autonomy of the LCA in terms of  
410 energy and the very small size of the sensors. For example, the LCA could be useful  
411 to spatialize *in situ* albedos in glacierized catchments: both on the glacier, where the  
412 evolution of the snow cover can be monitored, and in the non-glacierized part for the  
413 evolution of the seasonal snow cover and, more generally, the changes in the ground  
414 albedo due to, for example, variations in the soil moisture (Gascoin *et al.*, 2009). The  
415 comparison between the LCA measurements and LANDSAT images during the period  
416 extending from 10/18/2015 to 06/30/2016 showed that the LCA is a powerful tool that  
417 can be used to quantify the evolution of the *albedo index* and to characterize the  
418 surface state of the glacier by distinguishing between fresh snow, dirty snow and ice.  
419 In order to have good results for the *albedo index* calculated with the LCA, a certain  
420 degree of caution is required: for example, snow particles should not stay on the sensor  
421 and the sensor must be kept horizontal. **Therefore, we recommend a frequency of**  
422 **about 15 days between each field visit and data download.** This new system has  
423 demonstrated its usefulness for a tropical glacier and future studies in other climatic  
424 contexts should be conducted.

## 425 **5- Acknowledgments**

426 This study was funded by the French *Institut de Recherche pour le Développement*  
427 (IRD) through the Andean part of the French glacier observatory service, GLACIOCLIM  
428 (<http://www-igge.ujf-grenoble.fr/ServiceObs/SiteWebAndes/index.htm>), and was  
429 carried out within the framework of the International Joint Laboratory GREAT-ICE, a



430 joint initiative of the IRD as well as universities and institutions in Bolivia, Peru, Ecuador  
431 and Colombia. All of the contributing authors acknowledge the contribution of LABEX  
432 OSUG@2020, ANR grant No. ANR-10-LABX-56. The Pléiades satellite image used  
433 for Figure 1 was obtained from the CNES-ISIS FC18473 program funded by the  
434 BIOTHAW project (AAP-SCEN-2011-II). The authors would like to thank everyone who  
435 participated in the field campaigns: Patrick Ginot, Maxime Harter and Pierre Vincent.  
436 We thank Sara Mullin and Lance Brooks for the correction of English text.

## 437 **8- References**

438 Boehner, J., Antonic, O. (2009): 'Land-surface parameters specific to topo-  
439 climatology'. in: Hengl, T., Reuter, H. (Eds.): 'Geomorphometry - Concepts,  
440 Software, Applications'. Developments in Soil Science, Volume 33, p.195-226,  
441 Elsevier

442 **Brock, B., Willis, I., Sharp, M. (2000). Measurement and parametrization of albedo**  
443 **variations at Haut Glacier d'arolla, Swizerland. Journal of Glaciology, 46(155), 675-**  
444 **688. Doi:10.3189/172756500781832675**

445 Carmagnola, C. M., Domine, F., Dumont, M., Wright, P., Strellis, B., Bergin, M., et al.  
446 (2013). Snow spectral albedo at Summit, Greenland: comparison between in situ  
447 measurements and numerical simulations using measured physical and chemical  
448 properties of the snowpack. The Cryosphere, 7, 1139–1160.  
449 <http://dx.doi.org/10.5194/tc-7-1139-2013>. Colbeck, S.C., 1983, Theory of  
450 metamorphism of dry snow, Journal of Geophysical Research-Oceans and  
451 atmospheres, 88(NC9), 5475-5482

452 Corripio, J., 2004. Snow surface albedo estimation using terrestrial photography. Int.  
453 J. Remote Sensing, 24(24), 5705-5729

454 Dumont, M., P. Sirguey, Y. Arnaud and D. Six. 2011. Monitoring spatial and temporal  
455 variations of surface albedo on Saint Sorlin Glacier (French Alps) using terrestrial  
456 photography. *Cryosphere*, 5, 759-771. doi: 10.5194/tc-5-759-2011

457 Dumont, M., J. Gardelle, P. Sirguey, A. Guillot, D. Six, A. Rabatel and Y. Arnaud.  
458 2012. Linking glacier annual mass balance and glacier albedo retrieved from MODIS  
459 data. *Cryosphere*, 6, 1527-1539. doi: 10.5194/tc-6-1527-2012

460 Gascoin, S., Ducharne, A., Ribstein, P., Perroy, E., Wagnon, P., 2009, Sensitivity of  
461 bare soil albedo to surface soil moisture on the moraine of the Zongo glacier  
462 (Bolivia), *Geophysical Research Letters*, volume 36, Issue 2,  
463 DOI: 10.1029/2008GL036377

464 Gardner, A.S., Sharp, M.J., 2010, A review of snow and ice albedo and the  
465 development of a new physically based broadband albedo parameterization,  
466 *Journal of Geophysical Research*, VOL. 115, F01009, doi:10.1029/2009JF001444

467 Klok, E. J., W. Greuell, and J. Oerlemans (2003), Temporal and spatial variation of  
468 the surface albedo of Morteratschgletscher, Switzerland, as derived from 12  
469 Landsat images, *J. Glaciol.*, 49, 491–502, doi:10.3189/172756503781830395.

470 Mullen, P.C, Warren, S.G., 1988, Theory of the optical properties of lake ice,  
471 Volume 93, Issue D7, Pages 8403–8414 DOI: 10.1029/JD093iD07p08403

472 Rabatel, A., A. Bermejo, E. Loarte, A. Soruco, J. Gomez, G. Leonardini, C. Vincent, J.-  
473 E. Sicart. 2012. Can the snowline be used as an indicator of the equilibrium line and  
474 mass balance for glaciers in the outer tropics? *Journal of Glaciology*, 58(212), 1027-  
475 1036. doi: 10.3189/2012JoG12J027.

476 Rabatel, A., B. Francou, A. Soruco, J. Gomez, B. Caceres, J.L. Ceballos, R.  
477 Basantes, M. Vuille, J.-E. Sicart, C. Huggel, M. Scheel, Y. Lejeune, Y. Arnaud, M.  
478 Collet, T. Condom, G. Consoli, V. Favier, V. Jomelli, R. Galarraga, P. Ginot, L.  
479 Maisincho, M. Ménégoz, J. Mendoza, E. Ramirez, P. Ribstein, W. Suarez, M.  
480 Villacis, P. Wagnon. 2013. Current state of glaciers in the tropical Andes: a multi-  
481 century perspective on glacier evolution and climate change. *The Cryosphere*, 7,  
482 81-102. doi:10.5194/tc-7-81-2013.

483 Stamnes, K., Tsay, S.-C., Wiscombe, W., and Jayaweera, K.: Numerically stable  
484 algorithm for discrete-ordinate-method radiative transfer in multiple scattering and  
485 emitting layered media, *Appl. Opt.*, 27, 2502–2509, 1988.

486 Sicart, J. E., P. Ribstein, P. Wagnon, and D. Brunstein (2001), Clear sky albedo  
487 measurements on a sloping glacier surface. A case study in the Bolivian Andes,  
488 *Journal of Geophysical Research*, 106(D23), 31729-31738

489 Sicart JE, Hock R, Ribstein P, Litt M and Ramirez E (2011) Analysis of seasonal  
490 variations in mass balance and meltwater discharge of the tropical Zongo Glacier  
491 by application of a distributed energy balance model. *J. Geophys. Res.*, 116(D13),  
492 D13105 (doi: 10.1029/2010JD015105)

493 Sicart J.E., Espinoza J.C., Quéno L. and M. Medina. (2016), Radiative properties of  
494 clouds over a tropical Bolivian glacier: seasonal variations and relationship with  
495 regional atmospheric circulation, *International Journal of Climatology*, Volume 36,  
496 Issue 8, 3116–3128 (doi: 10.1002/joc.4540).

497 Stroeve, J., A. Nolin, and K. Steffen (1997), Comparison of AVHRRderived and in situ  
498 surface albedo over the Greenland Ice Sheet, *Remote Sens. Environ.*, 62, 262–  
499 276, doi:10.1016/S0034-4257(97)00107-7.

500 Stamnes, K., Tsay, S.-C., Wiscombe, W., and Jayaweera, K., 1988, Numerically  
501 stable algorithm for discrete-ordinate-method radiative transfer in multiple  
502 scattering and emitting layered media, *Appl. Opt.*, 27, 2502–2509

503 Tachikawa, T., Kaku, M., Iwasaki, A., Gesch, D., Oimoen, M., Zhang, Z., Danielson,  
504 J., Krieger, T., Curtis, B., Haase, J., Abrams, M., Crippen, R., Carabajal, C., 2011.  
505 ASTER Global Digital Elevation Model Version 2 — Summary of validation results.  
506 METI & NASA, (28 pp.).

507 van den Broeke, M., D. van As, C. Reijmer, and R. van de Wal, 2004, Assessing and  
508 improving the quality of unattended radiation observations in Antarctica, *J. Atmos.*  
509 *Oceanic Technol.*, 21, 1417–1431, doi:10.1175/1520-  
510 0426(2004)021<1417:AAITQO>2.0.CO;2.

511 Vuille M and Ammann C (1997) Regional snowfall patterns in the high, arid Andes.  
512 *Climatic Change*, 36(3–4), 413–423 (doi: 10.1023/A:1005330802974)

513 Warren, S.G., 1982, Optical-properties of snow, *Reviews of Geophysics*, 20(1), 67-89
